# Supplementary material
Source: PubMed Central journal article supplement (PMC6008788)
Supplement: NIHMS974337-supplement-supplement_1.pdf [file NIHMS974337-supplement-supplement_1.pdf]

# Supplement Table s1

Statistical analyses for main paper **Table 2** 12-month prevalence of DSM-IV anxiety disorder, perceived need for treatment, receipt of any 12-month treatment, and receipt of possibly adequate treatment (Total N=51,547)

|                                                   | 12-month<br>diagnosis of<br>Anxiety Disorder | Any treatment<br><br>(among those<br>w disorder) | Possibly<br>adequate<br>treatment<br><br>(among those<br>w disorder) | Perceived need<br>for treatment<br><br>(among those<br>w disorder) | Any 12-Month<br>Treatment<br><br>(among those w<br>perceived need) | Possibly<br>adequate<br>treatment<br><br>(among those w<br>perceived need<br>& any<br>treatment) |
|---------------------------------------------------|----------------------------------------------|--------------------------------------------------|----------------------------------------------------------------------|--------------------------------------------------------------------|--------------------------------------------------------------------|--------------------------------------------------------------------------------------------------|
|                                                   | 1*                                           | 2*                                               | 3*                                                                   | 4*                                                                 | 5*                                                                 | 6*                                                                                               |
| Chi-Sq Tests                                      | %(SE)                                        | %(SE)                                            | %(SE)                                                                | %(SE)                                                              | %(SE)                                                              | %(SE)                                                                                            |
| <b>Total</b>                                      |                                              |                                                  |                                                                      |                                                                    |                                                                    |                                                                                                  |
| 22 df test across all surveys                     | 1548.0 (<0.0001)                             | 318.4 (<0.0001)                                  | 307.1 (<0.0001)                                                      | 537.2 (<0.0001)                                                    | 420.4 (<0.0001)                                                    | 166.4 (<0.0001)                                                                                  |
| 2 df test comparing the 3 big income groups       | 66.4 (<0.0001)                               | 209.5 (<0.0001)                                  | 193.6 (<0.0001)                                                      | 213.9 (<0.0001)                                                    | 205.1 (<0.0001)                                                    | 43.1 (<0.0001)                                                                                   |
| 11 df test for differences within high income     | 937.4 (<0.0001)                              | 62.3 (<0.0001)                                   | 65.8 (<0.0001)                                                       | 169.1 (<0.0001)                                                    | 62.1 (<0.0001)                                                     | 93.2 (<0.0001)                                                                                   |
| 5 df test for differences within upper-middle     | 290.5 (<0.0001)                              | 26.1 (0.0001)                                    | 30.1 (<0.0004)                                                       | 24.6 (0.0068)                                                      | 77.4 (<0.0001)                                                     | 16.4 (<0.0310)                                                                                   |
| 4 df test for differences within low/lower-middle | 232.1 (<0.0001)                              | 3.3 (0.5109)                                     | 19.1 (0.1237)                                                        | 140.5 (<0.0001)                                                    | 68.6 (<0.0001)                                                     | 16.6 (<0.0001)                                                                                   |
| <b>Without Comorbidity</b>                        |                                              |                                                  |                                                                      |                                                                    |                                                                    |                                                                                                  |
| 22 df test across all surveys                     | 462.54 (<0.0001)                             | 159.53 (<0.0001)                                 | 54.72 (<0.0001)                                                      | 192.81 (<0.0001)                                                   | 165.90 (<0.0001)                                                   | 37.54 (<0.0001)                                                                                  |
| 2 df test comparing the 3 big income groups       | 15.36 (0.0039)                               | 70.53 (<0.0001)                                  | 32.01 (<0.0001)                                                      | 38.51 (<0.0001)                                                    | 53.40 (<0.0001)                                                    | 10.67 (0.0006)                                                                                   |
| 11 df test for differences within high income     | 252.78 (<0.0001)                             | 54.97 (<0.0001)                                  | 12.23 (0.1735)                                                       | 73.58 (<0.0001)                                                    | 40.78 (<0.0001)                                                    | 20.74 (<0.0001)                                                                                  |
| 5 df test for differences within upper-middle     | 101.89 (<0.0001)                             | 16.33 (0.0182)                                   | 5.23 (0.5557)                                                        | 17.32 (0.0271)                                                     | 40.45 (<0.0001)                                                    | 1.96 (0.6497)                                                                                    |
| 4 df test for differences within low/lower-middle | 88.90 (<0.0001)                              | 11.03 (0.0559)                                   | 2.98 (0.0319)                                                        | 64.59 (<0.0001)                                                    | 34.17 (0.0001)                                                     | 6.01 (0.0001)                                                                                    |
| <b>With Comorbidity</b>                           |                                              |                                                  |                                                                      |                                                                    |                                                                    |                                                                                                  |
| 22 df test across all surveys                     | 557.78 (<0.0001)                             | 300.32 (<0.0001)                                 | 223.00 (<0.0001)                                                     | 281.71 (<0.0001)                                                   | 269.67 (<0.0001)                                                   | 130.34 (<0.0001)                                                                                 |

|                                                   |                  |                  |                  |                  |                  |                 |
|---------------------------------------------------|------------------|------------------|------------------|------------------|------------------|-----------------|
| 2 df test comparing the 3 big income groups       | 12.04 (0.0348)   | 232.18 (<0.0001) | 133.79 (<0.0001) | 111.33 (<0.0001) | 148.70 (<0.0001) | 28.60 (<0.0001) |
| 11 df test for differences within high income     | 410.07 (<0.0001) | 31.99 (0.0032)   | 43.46 (0.0003)   | 72.43 (<0.0001)  | 39.28 (0.0017)   | 71.85 (<0.0001) |
| 5 df test for differences within upper-middle     | 47.85 (<0.0001)  | 32.33 (<0.0001)  | 35.60 (<0.0001)  | 29.90 (<0.0001)  | 41.43 (<0.0001)  | 19.41 (0.0002)  |
| 4 df test for differences within low/lower-middle | 89.21 (<0.0001)  | 10.62 (0.1370)   | 36.45 (0.0001)   | 68.51 (<0.0001)  | 35.58 (<0.0001)  | 13.39 (<0.0001) |

\*Key:

1. People with 12-month anxiety disorder
2. Percentage of those in 1 (12-month anxiety) who received any treatment over 12 months
3. Percentage of those in 1 (12-month anxiety) who received possibly adequate treatment
4. Percentage of those people in 1 (12-month anxiety) who had a “perceived need”
5. Percent of those in 4 (with a “perceived need”) who received any treatment over 12 months
6. Percentage of those in 5 (with a perceived need and treated) who received possibly adequate treatment

^There are no participants who reported having possibly adequate treatment in Nigeria

\*\*Unable to estimate SE due to sparse sampling

**Supplement Table s2**

Statistical analyses for main paper **Table 3** 12-month prevalence of anxiety disorder, perceived need for treatment, receipt of any treatment, and receipt of possibly adequate treatment by mental comorbidity status

|                          | 12-month diagnosis of<br>Anxiety Disorder | Any treatment                       | Possibly<br>adequate<br>treatment   | Perceived need<br>for treatment     | Any 12-Month<br>Treatment                                  | Possibly adequate<br>treatment                        | N    |
|--------------------------|-------------------------------------------|-------------------------------------|-------------------------------------|-------------------------------------|------------------------------------------------------------|-------------------------------------------------------|------|
|                          |                                           | (among those w<br>anxiety disorder) | (among those w<br>anxiety disorder) | (among those w<br>anxiety disorder) | (among those w<br>anxiety disorder<br>& perceived<br>need) | (among those w<br>perceived need &<br>any treatment ) |      |
|                          |                                           | 1*                                  | 2*                                  | 3*                                  | 4*                                                         | 5*                                                    |      |
|                          | %(SE)                                     | %(SE)                               | %(SE)                               | %(SE)                               | %(SE)                                                      | %(SE)                                                 |      |
| I.High Income            |                                           |                                     |                                     |                                     |                                                            |                                                       |      |
| With Comorbidity         | 25.4 (0.6)                                | 46.4 (1.0)                          | 17.7 (0.9)                          | 60.9 (1.2)                          | 76.2 (1.5)                                                 | 38.1 (1.6)                                            | 2841 |
| Without Comorbidity      | 5.7 (0.2)                                 | 22.4 (1.1)                          | 5.3 (0.5)                           | 31.3 (1.3)                          | 71.7 (1.9)                                                 | 23.6 (1.6)                                            | 1505 |
| Total                    | 10.3 (0.3)                                | 36.3 (0.8)                          | 13.8 (0.6)                          | 48.4 (0.9)                          | 75.0 (1.3)                                                 | 38.0 (1.4)                                            | 4346 |
| Chi Sq (p-value)         | 2467.10 (<0.0001)                         | 184.92 (<0.0001)                    | 134.23 (<0.0001)                    | 208.43 (<0.0001)                    | 2.93 (0.0870)                                              | 26.77 (<0.0001)                                       |      |
| II. Upper-middle income  |                                           |                                     |                                     |                                     |                                                            |                                                       |      |
| With Comorbidity         | 27.0 (0.9)                                | 27.9 (1.4)                          | 7.3 (1.0)                           | 50.2 (1.7)                          | 55.5 (2.3)                                                 | 26.2 (3.1)                                            | 1196 |
| Without Comorbidity      | 6.7 (0.3)                                 | 13.2 (1.3)                          | 2.6 (0.7)                           | 23.0 (1.6)                          | 57.5 (3.2)                                                 | 19.6 (3.2)                                            | 973  |
| Total                    | 10.6 (0.3)                                | 20.4 (1.0)                          | 7.1 (0.7)                           | 36.3 (1.3)                          | 56.1 (1.9)                                                 | 34.8 (2.6)                                            | 2169 |
| Chi Sq (p-value)         | 569.71 (<0.0001)                          | 53.46 (<0.0001)                     | 12.22 (0.0005)                      | 128.72 (<0.0001)                    | 0.2052 (0.6506)                                            | 1.38 (0.2409)                                         |      |
| III. Lower-middle income |                                           |                                     |                                     |                                     |                                                            |                                                       |      |
| With Comorbidity         | 23.2 (1.1)                                | 19.9 (2.1)                          | 3.9 (1.2)                           | 40.3 (2.3)                          | 49.4 (3.3)                                                 | 19.7 (3.3)                                            | 650  |
| Without Comorbidity      | 5.5 (0.3)                                 | 8.5 (1.4)                           | 0.5 (0.2)                           | 20.5 (2.0)                          | 41.8 (6.1)                                                 | 5.7 (1.9)                                             | 745  |
| Total                    | 7.9 (0.3)                                 | 13.1 (1.4)                          | 2.3 (0.7)                           | 28.5 (1.6)                          | 46.1 (3.5)                                                 | 17.9 (2.7)                                            | 1395 |
| Chi Sq (p-value)         | 491.38 (<0.0001)                          | 18.87 (<0.0001)                     | 18.05 (<0.0001)                     | 33.32 (<0.0001)                     | 1.15 (0.2837)                                              | 11.89 (0.0006)                                        |      |
| All Countries            |                                           |                                     |                                     |                                     |                                                            |                                                       |      |

|                            | 12-month diagnosis of<br>Anxiety Disorder | Any treatment<br><br><i>(among those w<br/>anxiety disorder)</i> | Possibly<br>adequate<br>treatment<br><br><i>(among those w<br/>anxiety disorder)</i> | Perceived need<br>for treatment<br><br><i>(among those w<br/>anxiety disorder)</i> | Any 12-Month<br>Treatment<br><br><i>(among those w<br/>anxiety disorder<br/>&amp; perceived<br/>need)</i> | Possibly adequate<br>treatment<br><br><i>(among those w<br/>perceived need &amp;<br/>any treatment )</i> | N           |
|----------------------------|-------------------------------------------|------------------------------------------------------------------|--------------------------------------------------------------------------------------|------------------------------------------------------------------------------------|-----------------------------------------------------------------------------------------------------------|----------------------------------------------------------------------------------------------------------|-------------|
| <b>With Comorbidity</b>    | 25.4 (0.5)                                | 37.8 (0.8)                                                       | 13.0 (0.6)                                                                           | 55.2 (0.9)                                                                         | 68.6 (1.1)                                                                                                | 34.5 (1.4)                                                                                               | 4687        |
| <b>Without Comorbidity</b> | 5.9 (0.1)                                 | 16.5 (0.7)                                                       | 3.4 (0.3)                                                                            | 26.3 (0.9)                                                                         | 62.7 (1.9)                                                                                                | 20.5 (1.3)                                                                                               | 3223        |
| <b>Total</b>               | <b>9.8 (0.2)</b>                          | <b>27.6 (0.6)</b>                                                | <b>9.8 (0.4)</b>                                                                     | <b>41.3 (0.7)</b>                                                                  | <b>66.8 (1.1)</b>                                                                                         | <b>35.5 (1.1)</b>                                                                                        | <b>7910</b> |
| <b>Chi Sq (p-value)</b>    | <b>3287.47 (&lt;0.0001)</b>               | <b>311.68 (&lt;0.0001)</b>                                       | <b>184.90 (&lt;0.0001)</b>                                                           | <b>389.75 (&lt;0.0001)</b>                                                         | <b>6.70 (0.0097)</b>                                                                                      | <b>36.50 (&lt;0.0001)</b>                                                                                |             |

\*Key:

1. People with 12-month anxiety disorder
2. Percentage of those in 1 (12-month anxiety) who received any treatment over 12 months
3. Percentage of those in 1 (12-month anxiety) who received possibly adequate treatment
4. Percentage of those people in 1 (12-month anxiety) who had a “perceived need”
5. Percent of those in 4 (with a “perceived need”) who received any treatment over 12 months
6. Percentage of those in 5 (with a perceived need and treated) who received possibly adequate treatment

^There are no participants who reported having possibly adequate treatment in Nigeria

\*\*Unable to estimate SE due to sparse sampling
